# Supplementary material for: First evaluation of the GEMS glyoxal products against TROPOMI and ground-based measurements
Source: Copernicus journal article supplement (doi:10.5194/egusphere-2024-589), 2024-03-15
Supplement: Supplementary file [file egusphere-2024-589-AC1-supplement.pdf]

## Responses to Referee's Comments

We are grateful for the referee's valuable and insightful comments. The referee's comments are presented in black, our responses are highlighted in blue, and the revisions made in the manuscript are indicated in red.

### Referee #2:

The authors present retrieved glyoxal columns from the GEMS instrument. Given its short lifetime, measurements from GEO are particularly well-suited to monitoring this trace gas, and the present study is the first of its kind to do this. Glyoxal retrievals from space are challenging due to the gas' low concentrations and to spectral interference from other trace species. The authors have done an excellent job in extracting the glyoxal signal from the data, although the main components of the retrieval algorithm do not differ significantly from approaches in previous studies. I would like to see some additional elaboration on the methods used here, as well as error analyses and studies of sensitivities of the retrieval to assumptions in the algorithm.

The writing in this paper is clear and the manuscript is well organized. Citations are appropriate. With the additions and minor corrections suggested below, I believe it should be published in AMT.

### General comments:

1. On page 8 (lines 189-193), the empirical NO<sub>2</sub> correction is discussed. When applied, summer differences with TROPOMI become larger, and the winter smaller. In figure 6, or in a separate similar figure, it would be useful to show the GEMS glyoxal with and without the NO<sub>2</sub> correction. How does this affect the correlation coefficients? Could differences in correlation lend support the inclusion of the correction?

In the same figure, we depicted the monthly variation of GEMS VCDs with and without applying the NO<sub>2</sub> correction. When the correction is applied, GEMS glyoxal VCDs decrease in larger amounts in winter than in summer in the regions with high NO<sub>2</sub> concentrations, such as Korea, NCP, and YRD. This substantially increases the correlation coefficients, improving from 0.16–0.40 to 0.45–0.72 in these high NO<sub>2</sub> regions. Therefore, it is highly likely that NO<sub>2</sub> inhibits accurate representation of monthly variation, necessitating the correction for NO<sub>2</sub>.

L281: To eliminate artifacts caused by NO<sub>2</sub> interference, we empirically corrected glyoxal SCDs using the same linear regression equation derived from the TROPOMI glyoxal retrieval algorithm ( $-8.75 \times 10^{12} - 7.01 \times 10^{-3} \times NO_2 \text{ SCD}$ ; Lerot et al., 2021). The corrected GEMS VCDs are depicted in grey lines in Figure 9. Monthly averaged GEMS NO<sub>2</sub> SCDs V2.0 in 2021 are used to correct GEMS glyoxal SCDs for all years (2020, 2021, 2022). In NCP, where the NO<sub>2</sub> concentration is the highest, mean GEMS NO<sub>2</sub> SCDs are  $1.57 \times 10^{16}$  molecules cm<sup>-2</sup> in June 2021 and  $2.74 \times 10^{16}$  molecules cm<sup>-2</sup> in December 2021. The relative differences between GEMS and TROPOMI ( $\frac{GEMS-TROPOMI}{TROPOMI}$ ) glyoxal VCDs in NCP without applying NO<sub>2</sub> correction are -5% and 167% in June 2021 and December 2021, respectively. When the NO<sub>2</sub> correction is applied, the relative differences are -28% and 49% in June and December 2021, respectively. While the negative bias in the summer worsens to some extent, the positive bias in the winter improves significantly. As a result, the monthly correlation coefficients improve drastically from 0.16–0.40 to 0.45–0.72 in the regions with high NO<sub>2</sub> concentrations, including Korea, NCP, and YRD.

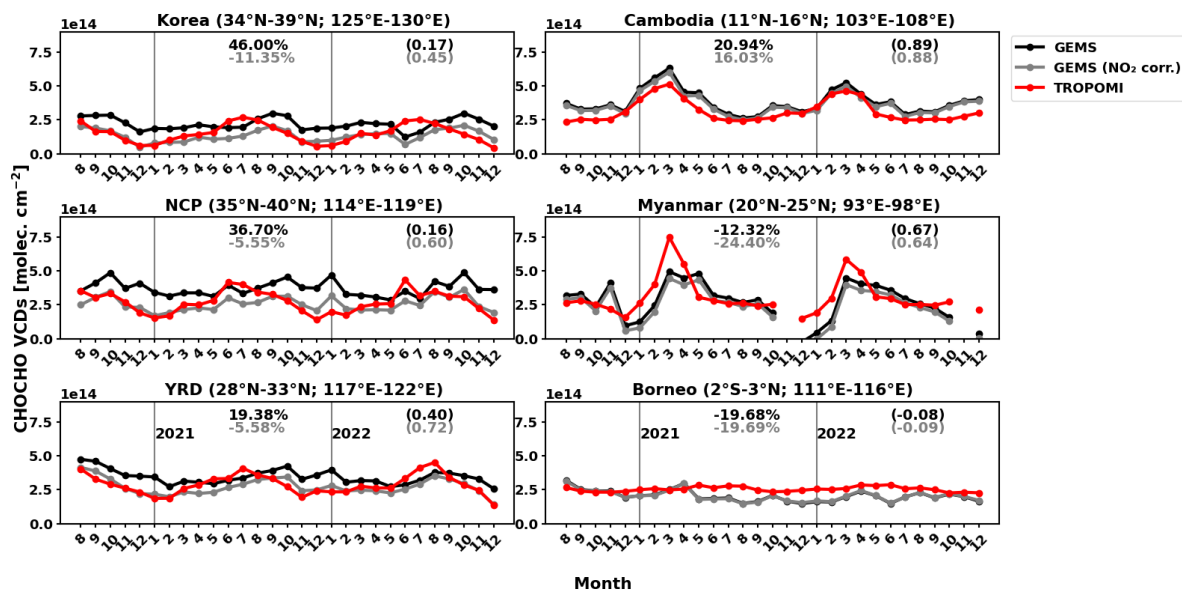

**Figure 9.** Monthly mean glyoxal VCDs from August 2020 to December 2022 at 11:30–15:30 local time. The black lines represent GEMS VCDs, the grey lines represent GEMS VCDs corrected for NO<sub>2</sub>, and the red lines represent TROPOMI VCDs. The numbers on the left denote the normalized mean bias of GEMS VCDs without (black) and with (grey) NO<sub>2</sub> correction relative to TROPOMI VCDs. The numbers in the parentheses in black and grey denote the correlation coefficient of GEMS and TROPOMI VCDs without and with NO<sub>2</sub> correction, respectively.

- The VCDs derived relative to spectra from clean reference regions are corrected using GEOS-Chem modeled glyoxal. These model amounts are likely low. Silva et al. suggest the error may be a factor of 3. Have the authors tried increasing the model offsets to counter the effects of these erroneous background values? Perhaps comparisons could be shown.

To confirm the effect of the increase in background values, we tripled the background used in GEMS glyoxal V2.0, as suggested by Silva et al. (2018). The resulting glyoxal VCDs are shown as the blue lines in Figure R1. Background values have minimal impacts on VCDs within the latitude range of 3° N to 25° N, which includes Cambodia and Myanmar. The reference sector in this latitude range is mostly occupied by the ocean, thereby representing low simulated glyoxal VCDs. In contrast, there are considerable changes in VCDs in other latitude ranges, as shown in the monthly variation of Korea, NCP, YRD, and Borneo. GEMS VCDs with NO<sub>2</sub> correction and using background values from GEMS glyoxal V2.0 show underestimation in summer. When the background is increased threefold, GEMS VCDs nearly match TROPOMI VCDs in summer but exceed TROPOMI VCDs in other seasons.

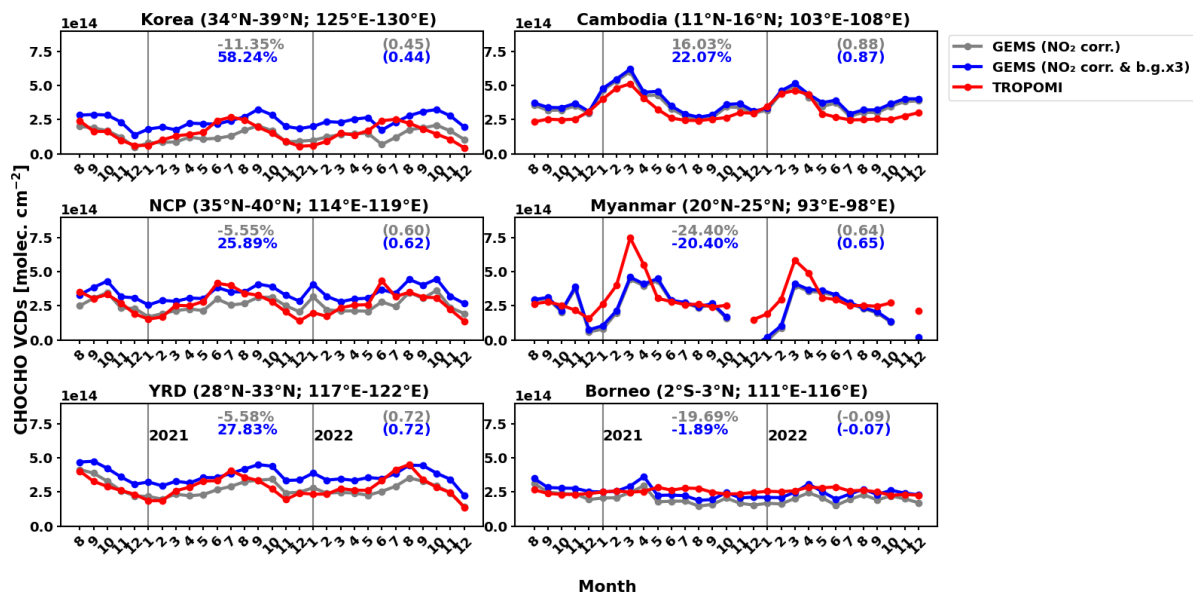

Figure R1. Monthly mean glyoxal VCDs from August 2020 to December 2022 at 11:30–15:30 local time. The red lines represent TROPOMI VCDs, the grey lines represent GEMS VCDs corrected for NO<sub>2</sub>, and the blue lines represent GEMS VCDs corrected for NO<sub>2</sub> and using three times larger background values.

- This paper would benefit from a more comprehensive error analysis, particularly with consideration of the contribution of the major systematic errors, including AMF and background. Glyoxal is a difficult measurement and these errors are likely to be large. Lerot et al. estimated up to 70% error in polluted regions, which I suspect might even be low, given the uncertainties the authors have identified related to background and reference-sector choice.

We added Sect. 3 discussing the uncertainty of each retrieval step.

### L163: 3 Uncertainty analysis

In this section, we examine the uncertainty of each retrieval step. Assuming that each retrieval step is uncorrelated, the total uncertainty in the retrieval can be expressed as the sum of the uncertainties of each retrieval step (Boersma et al., 2004; Kwon et al., 2019; De Smedt et al., 2018):

$$\sigma_{VCD}^2 = \left( \frac{\partial VCD}{\partial SCD} \sigma_{SCD} \right)^2 + \left( \frac{\partial VCD}{\partial AMF} \sigma_{AMF} \right)^2 + \left( \frac{\partial VCD}{\partial VCD_m} \sigma_{VCD_m} \right)^2 + \left( \frac{\partial VCD}{\partial AMF_0} \sigma_{AMF_0} \right)^2, \quad (4)$$

where  $\sigma$  denotes uncertainty in each parameter. Using the relationship shown in Eq. (3), we can derive the sensitivity of VCDs to each parameter, resulting in the conversion of Eq. (4) as follows:

$$\sigma_{VCD}^2 = \frac{1}{AMF^2} \sigma_{SCD}^2 + \frac{SCD^2}{AMF^4} \sigma_{AMF}^2 + \frac{AMF_0^2}{AMF^2} \sigma_{VCD_m}^2 + \frac{VCD_m^2}{AMF^2} \sigma_{AMF_0}^2. \quad (5)$$

Uncertainty in each parameter includes both random and systematic components. Unlike systematic uncertainty, random uncertainty decreases for a spatial or temporal averaging in the ratio of  $\frac{1}{\sqrt{N}}$ , where  $N$  is the number of pixels averaged. In this study, we only consider random uncertainty in slant columns as random uncertainty in AMF and  $VCD_m$  are difficult to separate from the systematic uncertainty in practice.

### 3.1 Uncertainties in slant columns

#### L196: 3.1.2 Systematic uncertainties in slant columns

Systematic uncertainties in slant columns are associated with various factors such as wavelength calibration, bandpass function, residual stray light, and absorption cross-sections. We assessed the

uncertainty resulting from absorption cross-section, as it is a preeminent factor contributing to the uncertainty in slant columns (Lerot et al., 2021; De Smedt et al., 2018). The uncertainty related to absorption cross-section ( $\sigma_{SCD,abs}^2$ ) is estimated by matrix analysis, following Rodgers formalism (Rodgers, 2000):

$$\sigma_{SCD,abs}^2 = \sum_{j=1}^n dSCD_j^2 [GS_{bj}G], \quad (7)$$

where  $j$  ( $=1, \dots, n$ ) is the subscript for absorbing species;  $G$  is the matrix formed by  $G = [K^T K]^{-1} K^T$ , where  $K$  is the matrix constructed from the absorption cross-sections with the dimension of  $m \times n$  ( $m$  is the number of spectral grids);  $S_{bj}$  ( $n \times n$ ) is the cross-section error covariance matrix. The diagonal components of  $S_{bj}$  are assigned based on the uncertainties for the absorption cross-sections of each species: glyoxal (3%) (Volkamer et al., 2005),  $\text{NO}_2$  (3%) (Vandaele et al., 1998),  $\text{O}_3$  (2.6%) (Serdyuchenko et al., 2014), gas phase  $\text{H}_2\text{O}$  (4%) (Gordon et al., 2022), and  $\text{O}_4$  (3%) (Finkenzeller and Volkamer, 2022). The contribution of liquid water absorption is excluded in the calculation, as it had higher contributions than  $2 \times 10^{15}$  molecules  $\text{cm}^{-2}$  for some latitudes. The reference sector for glyoxal is mostly ocean, which represents high concentrations of liquid water. Using this reference sector for liquid water retrieval results in negative dSCDs with large absolute values over land, which could lead to a large contribution from the liquid water absorption cross-section. The dSCDs for each species are retrieved for March 2021.

For geostationary satellites, a radiance reference is required for every along-track, but the observation area is limited to certain regions such as Asia, North America, and Europe. As a result, the reference sector inevitably includes polluted regions, and the selection of the reference sector significantly influences retrieval results. Therefore, we examine the systematic uncertainty arising from the current reference sector. Since October 2020, scan areas have been fixed to Half East (HE), Half Korea (HK), Full Central (FC), and Full West (FW). The easternmost longitude of HE, HK, FC, and FW scan areas are  $152^\circ$  E,  $142^\circ$  E,  $142^\circ$  E, and  $133^\circ$  E, respectively. Therefore, relatively more clean areas in the Pacific Ocean are not observed in the HK, FC, and FW scan areas. However, during the in-orbit test period (IOT) from August to September 2020, observations were frequently taken as Nominal daily scan, which covers  $90$ – $150^\circ$  E (Figure 1 of Kwon et al., 2019). This enables us to obtain the reference spectrum over  $120$ – $150^\circ$  E during the IOT. Figure 5 demonstrates the sensitivity of retrieved glyoxal VCDs to the selection of reference spectrum depending on the scan areas in August 2020. Figure 5a illustrates glyoxal VCDs retrieved with the reference spectrum taken from the reference sector of  $120$ – $150^\circ$  E in August 2020. Figure 5b shows the same retrieved glyoxal VCDs but with the reference spectrum averaged over  $120$ – $133^\circ$  E, which is the narrow reference sector limited by the FW scan, frequently conducted after the IOT. VCDs in Figure 5b are about 22% lower on average than those in Figure 5a, possibly due to the effect of local pollution on the reference spectrum. We assumed the systematic uncertainty associated with the reference spectrum as the standard deviation of the difference in SCD retrieved from the reference sector of  $120$ – $133^\circ$  E and  $120$ – $150^\circ$  E averaged for the observations in August 2020.

Figure 6a shows the total systematic uncertainty in SCD and the contribution from each uncertainty source relative to glyoxal SCD. The contribution from the absorption cross-section of species  $j$  is calculated as  $\sqrt{dSCD_j^2 [GS_{bj}G]}$ . For most latitudes, uncertainty associated with the reference sector represented the largest ratio, followed by the uncertainties associated with  $\text{NO}_2$  and  $\text{O}_3$  absorption cross-sections. Figure 6b illustrates the contribution of SCD, AMF, and background correction to the uncertainty in VCD. The uncertainty in VCD is dominated by the uncertainty in SCD.

### 3.2 Uncertainty in AMF

We estimate the uncertainty in AMF by the composite of uncertainties in surface albedo

( $\alpha_s$ ), cloud top pressure ( $p_c$ ), effective cloud fraction ( $f_c$ ), and profile height parameter ( $p_h$ ) (Kwon et al., 2019):

$$\sigma_{AMF}^2 = \left( \frac{\partial AMF}{\partial \alpha_s} \sigma_{\alpha_s} \right)^2 + \left( \frac{\partial AMF}{\partial p_c} \sigma_{p_c} \right)^2 + \left( \frac{\partial AMF}{\partial f_c} \sigma_{f_c} \right)^2 + \left( \frac{\partial AMF}{\partial p_h} \sigma_{p_h} \right)^2, \quad (8)$$

where  $p_h$  is defined as the height below which 75% of glyoxal VCDs exist from the surface. The uncertainties  $\sigma_{\alpha_s}$ ,  $\sigma_{p_c}$ , and  $\sigma_{f_c}$  are assigned as 0.02, 50hPa, and 0.05, respectively (De Smedt et al., 2018; Kwon et al., 2019). The uncertainty  $\sigma_{p_h}$  is calculated as a standard deviation of  $p_h$  of a priori profile, ranging from 68hPa to 293hPa for different latitudes. The sensitivities of each parameter to AMF are obtained from the look-up table of the scattering weight at 448 nm. Uncertainties in AMF contribute 7–14% to the uncertainties in VCD across the latitudes.

### 3.3 Uncertainty in background correction

The contribution of background correction to the total uncertainty in VCD can be expressed as the sum of the third and fourth terms on the right-hand side of Eq. (5). We assign the uncertainty in simulated background concentration ( $\sigma_{VCD_m}$ ) as the standard deviation of simulated concentration for each latitude.  $\sigma_{VCD_m}$  ranges from  $2.5 \times 10^{12}$  to  $1.9 \times 10^{13}$  molecules  $\text{cm}^{-2}$ , and  $VCD_m$  ranges from  $2.5 \times 10^{12}$  to  $2.6 \times 10^{13}$  molecules  $\text{cm}^{-2}$ . The uncertainties in background correction represent lower values than those in SCD and AMF for most latitudes. The uncertainties in background correction represent relatively high values in the latitudes lower than  $0^\circ$  N and higher than  $28^\circ$  N, where terrestrial sources influence the reference sector. The total systematic uncertainties in VCD range from 33% to 61%, which is comparable to the 30% to 70% uncertainty range in TROPOMI glyoxal VCDs (Lerot et al., 2021).

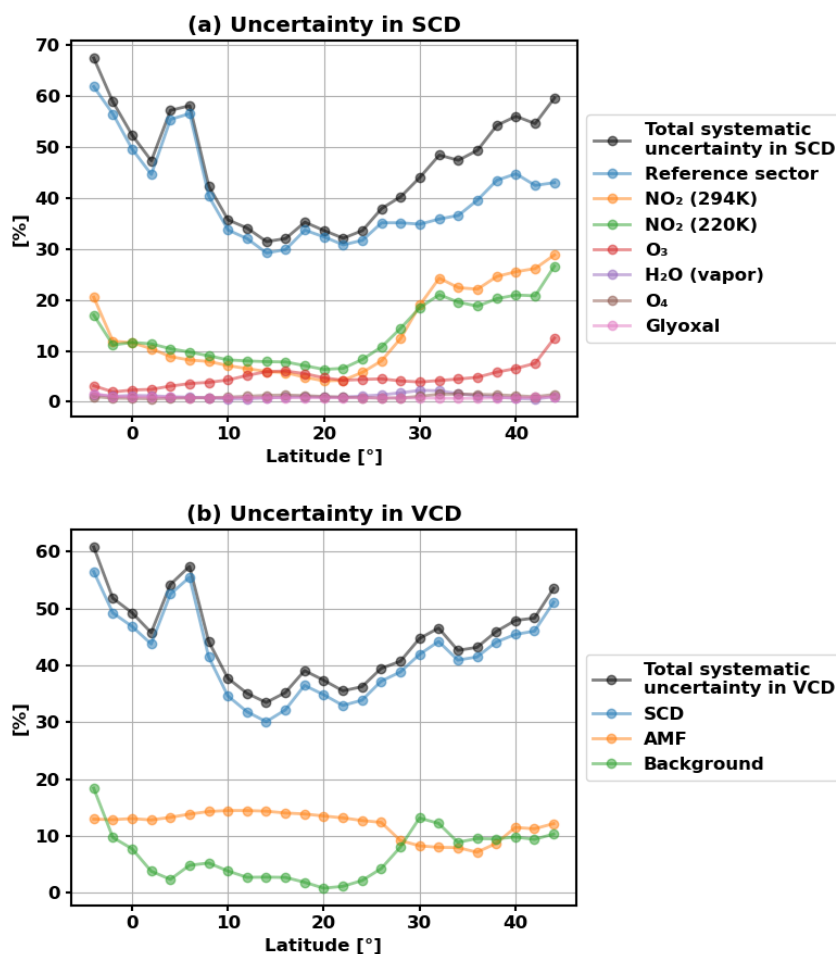

**Figure 6. (a) The systematic uncertainty in SCD averaged at every 2 degrees latitude relative to glyoxal SCD. The total systematic uncertainty in SCD is indicated by the black line, and the contributions from each uncertainty source are indicated by the colored lines. (b) The systematic uncertainty in VCD averaged relative to glyoxal VCD. The total systematic uncertainty in VCD is indicated by the black line, and the contributions from SCD, AMF, and background correction are indicated by the colored lines.**

4. Were glyoxal amounts in the reference sector estimated at local times comparable to the measurements? If not, perhaps any difference would be negligible. The authors could mention/justify a reason for ignoring this.

MAX-DOAS stations at Chiba, Kasuga, Fukue, and Seoul are included in the reference sector (120–150° E). The diurnal variations of GEMS VCDs in these stations are consistent with MAX-DOAS VCDs, showing high correlation coefficients (0.70–0.89) and low normalized mean biases (-9–20%). However, these regions are more polluted than the rest of the reference sector, and the ratios of the background values over VCDs are larger in the rest of the reference sector. Evaluating GEMS VCDs in the pristine region of the reference sector using independent measurements would validate the use of reference sector and background values. Unfortunately, there are few in situ measurements available for comparison with GEMS glyoxal over the ocean during the GEMS observation period.

#### Minor comments and suggested corrections:

1. Page 1, Line 20: Without the NO<sub>2</sub> correction, GEMS and TROPOMI VCDs are

approximately equal in summer. I suggest modifying the wording in the abstract, maybe: “Specifically, with an empirical NO<sub>2</sub> correction applied, GEMS VCDs are significantly lower in summer and higher in winter...”.

We revised the abstract as follows:

L20: Specifically, GEMS VCDs are higher in the winter and either lower or comparable to TROPOMI and MAX-DOAS VCDs in the summer across Northeast Asia. We attributed the discrepancies in the monthly variation to a polluted reference spectrum and high NO<sub>2</sub> concentrations. When we correct GEMS glyoxal VCDs as a function of NO<sub>2</sub> SCDs, the monthly correlation coefficients substantially increase from 0.16–0.40 to 0.45–0.72 in high NO<sub>2</sub> regions.

2. Page 3, Lines 64-67: Please add couple more sentences describing the GEMS instrument, including the native spatial resolution. This will help put the 4 x 4 co-adding in context.

We added the following sentence:

L83: The native spatial resolution of GEMS is  $3.5 \times 8 \text{ km}^2$ , with nitrogen dioxide, ozone, formaldehyde, and aerosol products retrieved at this resolution. For the weaker absorbers, we use co-added products, including radiance, irradiance, surface reflectance, and cloud products. Specifically, we co-add products with 4 (2×2) and 16 (4×4) GEMS pixels to retrieve sulfur dioxide and glyoxal, respectively, to enhance the signal-to-noise ratio.

3. Page 3, Line 75: “...converted to the VCD by dividing by the air mass factor ...”

We revised the phrase in the manuscript according to your correction.

4. Page 4, Line 100: The fitting window 433.0 – 461.5 nm is approximately the same as used by Lerot et al. and references therein. Did the authors in the present study arrive at this independently? Please clarify and include relevant citations.

We determined the optimal fitting window through sensitivity tests on various fitting windows. A description and figure of the sensitivity test results have been added.

L112: We conduct sensitivity tests of fitting window selection to minimize fitting RMS and column uncertainty of the retrieved glyoxal averaged over the entire domain by varying lower and upper wavelengths with 0.5 nm increments. Figure 1 shows the results of our sensitivity tests and our optimal fitting window of 433.0–461.5 nm for glyoxal retrieval. The fitting window of 433.0–461.5 nm was selected considering its low fitting RMS and column uncertainty. However, we find that the differential slant column densities (dSCDs) over the reference sector (120–150° E) retrieved with this fitting window have a positive value, which could result in a high systematic bias, which we discuss below.

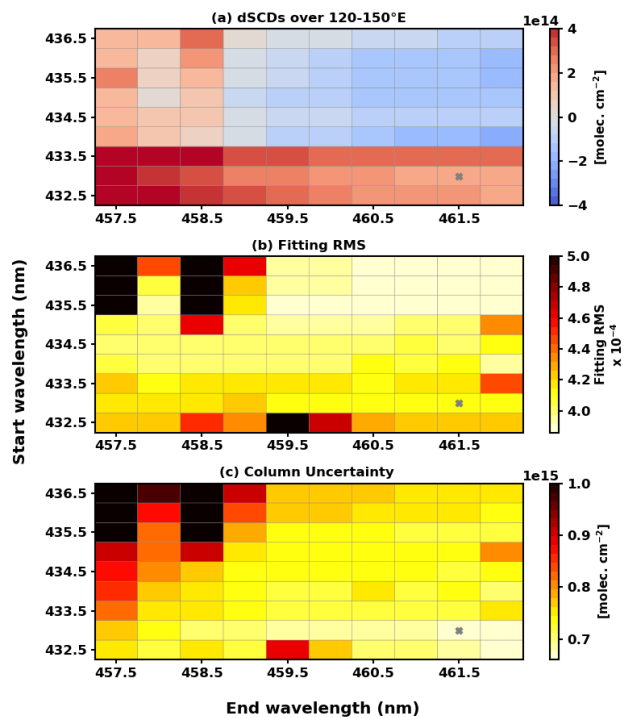

**Figure 1. Metrics used to select an optimal fitting window. Panel a shows dSCDs averaged over 120–150° E, and panels b and c show fitting RMS and column uncertainty averaged over the entire domain. Values are calculated from the retrieval at 04:45 UTC on 17 March 2021.**

- Page 6, Line 131: Please explicitly define AMF and AMF0.

L148:  $AMF(i,j)$  indicates the AMF at the  $i$ th cross-track (north-south direction) and  $j$ th along-track (east-west direction) positions, and  $AMF_0(lat)$  denotes the AMF over the reference sector.

- Page 9, Line 233: “MAX-DOAS”. Also, would it be reasonable to show GEMS vs MAX-DOAS diurnal correlation coefficients for each station?

We corrected the typo and added the diurnal correlation coefficients to Figure 11.



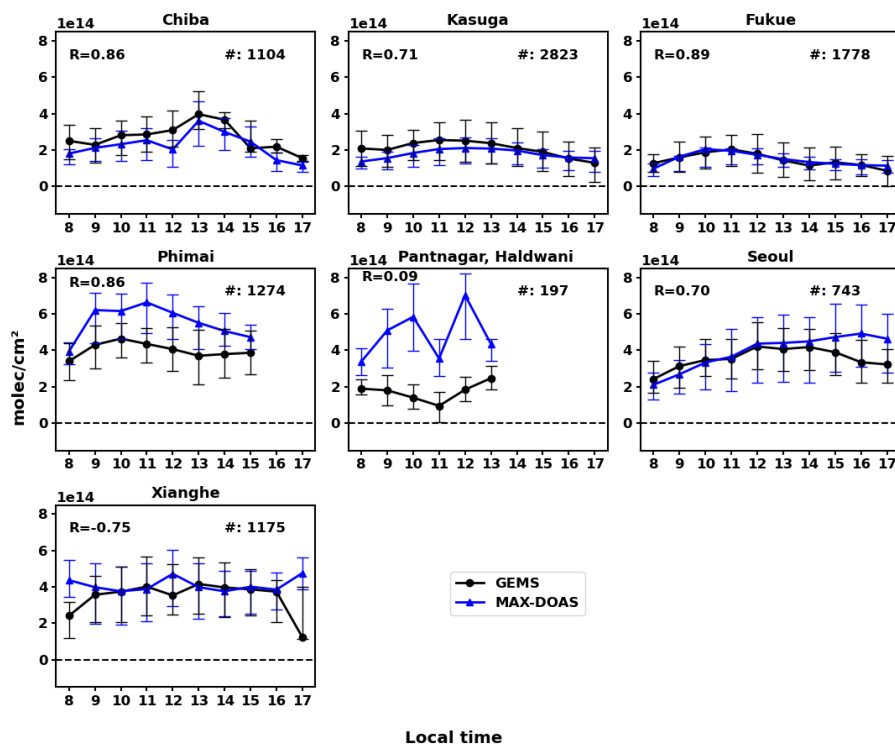

**Figure 11. Hourly mean glyoxal VCDs from GEMS (black line) and MAX-DOAS (blue line) from August 2020 to December 2021. The error bars indicate the 25<sup>th</sup> and 75<sup>th</sup> percentiles of hourly averaged VCDs. The numbers on the top left denote the diurnal correlation coefficients between GEMS and MAX-DOAS, and those on the top right denote the number of hourly data co-located at each station.**

- Page 20, caption figure 4: Please make it clear that Domain 2 is excluded from the surrounding Domain 1 (I assume that is what is meant).

We intended Domain 1 to include Domain 2, so we corrected and clarified the caption as follows:

L585: The green dashed line outlines the area defined as Domain 1, and the red dashed line outlines the area defined as Domain 2 (20–45° N, 110–130° E) in Figure 8. Domain 1 encompasses the area within the green dashed lines, including Domain 2.

- Pages 21-22, captions of figures 5 and 6, (and the body text), please state that the GEMS glyoxal amounts are shown before NO<sub>2</sub> correction. As suggested above, I recommend to showing the comparisons with and without the correction

We showed comparisons with and without the correction in Figure 9. Also, we stated that the GEMS glyoxal amounts are shown before the NO<sub>2</sub> correction as follows:

L315 : In addition, GEMS VCDs compared with MAX-DOAS VCDs are the values without applying NO<sub>2</sub> correction described in Sect. 4.

L596: GEMS VCDs depicted in this plot are the values without applying NO<sub>2</sub> correction described in Sect. 4.
